# Supplementary material for: Herpes simplex virus type 1 inflammasome activation in proinflammatory human macrophages is dependent on NLRP3, ASC, and caspase-1
Source: PubMed Central journal article supplement (PMC7043765; doi:10.1371/journal.pone.0229570), 2020-02-26

**A**

IFI16 (D8B5T) Rabbit mAb #14970

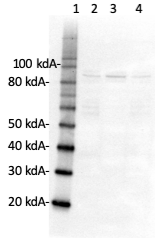

1. Magic Mark XP
2. Mock (4hr)
3. NGLPS (4hr)
4. HSV-1 (4hr)

beta Actin Loading Control Monoclonal Antibody (BA3R)

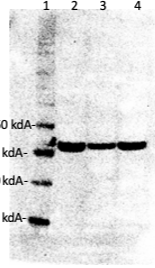**B**

IFI16 (D8B5T) Rabbit mAb #14970

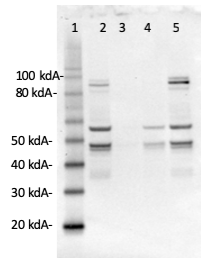

1. Magic Mark XP
2. Mock (24hr)
3. NGLPS (24hr)
4. HSV-1 (24hr)
5. HSV-1/UV (24hr)

beta Actin Loading Control Monoclonal Antibody (BA3R)

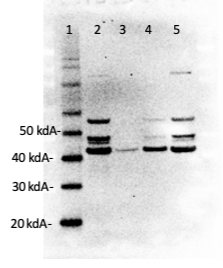**C**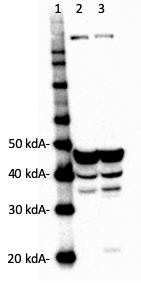

1. Magic Mark XP
2. Mock (4hr)
3. HSV-1 (4hr)

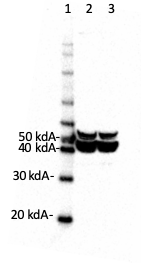

Supplement: pone.0229570.s003.pdf [file pone.0229570.s003.pdf]
